# Supplementary material for: Long-Term Effects of a Stepwise, Multimodal, Non-Restrictive Antimicrobial Stewardship Programme for Reducing Broad-Spectrum Antibiotic Use in the ICU
Source: MDPI journal article supplement (doi:10.3390/antibiotics13020132), 2024-01-29
Supplement: s1 [file s1]

## SUPPLEMENTARY APPENDIX

TABLE S1. Characteristics and outcomes of patients in the ICU. Period 2011-2019

TABLE S2. Use of antibiotic classes by DDD/100 patient-days in the ICU. Period 2011-2019

TABLE S3. Point prevalence survey characteristics. Period 2013-2019

Table S1. Characteristics and outcomes of patients in the ICU. Period 2011-2019

| <i>Year</i> | <i>Total admitted<br/>ICU patients<br/>N</i> | <i>Age<br/>(mean ± SD)</i> | <i>APACHE II<br/>(mean ± SD)</i> | <i>Length of<br/>stay<br/>(mean ± SD)</i> | <i>ICU<br/>Mortality<br/>(%)</i> | <i>30-day<br/>readmission<br/>(%)</i> |
|-------------|----------------------------------------------|----------------------------|----------------------------------|-------------------------------------------|----------------------------------|---------------------------------------|
| 2011        | 1,453                                        | 62±14                      | 16±8                             | 8.6±13                                    | 23                               | 5.0                                   |
| 2012        | 1,253                                        | 63±13                      | 17±8                             | 9.6±15                                    | 24                               | 7.4                                   |
| 2013        | 1,259                                        | 63±13                      | 17±8                             | 9.4±15                                    | 21                               | 5.6                                   |
| 2014        | 1,284                                        | 64±13                      | 17±8                             | 9.0±13                                    | 19                               | 4.8                                   |
| 2015        | 1,362                                        | 63±14                      | 15±8                             | 8.7±16                                    | 20                               | 7.1                                   |
| 2016        | 1,500                                        | 66±14                      | 16±8                             | 7.5±11                                    | 21                               | 5.4                                   |
| 2017        | 1,517                                        | 63±14                      | 16±7                             | 7.5±10                                    | 18                               | 5.5                                   |
| 2018        | 1,448                                        | 64±14                      | 15±9                             | 7.7±10                                    | 19                               | 6.8                                   |
| 2019        | 1,390                                        | 63±14                      | 16±8                             | 8.0±10                                    | 18                               | 6.0                                   |

Footnotes: Aggregated data from the hospital's standard reporting system

Table S2. Use of antibiotic classes by DDD/100 patient-days in the ICU. Period 2011-2019

| Year | Period | ATM   | AB    | PEN  | CEPH | CARB | FQ   | BSA  | AMG | GP   | Cs   | MC  | TG  | CLD+MTZ | DPT  |
|------|--------|-------|-------|------|------|------|------|------|-----|------|------|-----|-----|---------|------|
| 2011 | 1      | 174.7 | 158.1 | 55.0 | 12.3 | 13.5 | 13.0 | 31.4 | 3.9 | 12.1 | 19.6 | 4.4 | 0.2 | 6.2     | 4.0  |
|      | 2      | 194.5 | 176.4 | 51.6 | 18.7 | 20.4 | 14.5 | 43.7 | 2.2 | 13.6 | 29.9 | 7.1 | 0.1 | 5.7     | 4.3  |
|      | 3      | 243.1 | 221.7 | 61.9 | 12.4 | 30.3 | 19.0 | 48.4 | 5.7 | 16.8 | 47.9 | 3.5 | 1.0 | 6.9     | 3.7  |
| 2012 | 1      | 180.8 | 159.7 | 45.2 | 15.5 | 16.3 | 16.1 | 37.5 | 3.0 | 18.2 | 27.6 | 6.5 | 0.3 | 3.3     | 1.1  |
|      | 2      | 201.6 | 176.6 | 47.8 | 19.3 | 20.0 | 17.6 | 38.5 | 3.2 | 15.7 | 30.0 | 0.7 | 0.1 | 7.4     | 4.5  |
|      | 3      | 211.2 | 182.5 | 55.3 | 14.3 | 24.5 | 16.4 | 38.0 | 1.9 | 21.5 | 30.4 | 4.6 | 1.0 | 2.5     | 2.2  |
| 2013 | 1      | 170.4 | 151.7 | 41.7 | 17.5 | 19.0 | 13.3 | 39.7 | 2.5 | 12.7 | 25.5 | 3.6 | 0.2 | 5.1     | 3.5  |
|      | 2      | 169.9 | 152.0 | 36.1 | 19.1 | 18.7 | 14.0 | 42.7 | 1.1 | 16.3 | 26.2 | 4.7 | 0.2 | 3.7     | 2.7  |
|      | 3      | 173.0 | 161.3 | 45.5 | 13.7 | 26.5 | 18.0 | 42.1 | 2.0 | 17.3 | 20.4 | 4.8 | 0.1 | 3.3     | 1.8  |
| 2014 | 1      | 189.0 | 165.4 | 54.6 | 15.7 | 22.1 | 13.1 | 34.1 | 1.9 | 17.6 | 19.7 | 3.6 | 0.5 | 3.5     | 5.0  |
|      | 2      | 184.7 | 166.5 | 47.2 | 14.4 | 21.8 | 14.4 | 43.2 | 1.5 | 24.7 | 20.8 | 2.0 | 0.8 | 5.1     | 6.9  |
|      | 3      | 199.2 | 180.8 | 46.2 | 15.8 | 30.4 | 17.0 | 47.0 | 1.7 | 22.9 | 17.0 | 6.5 | 1.2 | 7.0     | 6.0  |
| 2015 | 1      | 191.3 | 168.3 | 41.2 | 17.7 | 26.3 | 18.1 | 44.2 | 1.6 | 18.7 | 19.1 | 4.0 | 0.8 | 4.5     | 7.5  |
|      | 2      | 189.4 | 167.2 | 45.6 | 17.8 | 27.8 | 13.3 | 47.2 | 1.4 | 16.6 | 18.2 | 5.2 | 0.9 | 3.7     | 5.3  |
|      | 3      | 203.5 | 174.0 | 39.2 | 17.2 | 36.2 | 17.3 | 59.6 | 1.7 | 23.9 | 20.0 | 3.1 | 0.8 | 3.8     | 2.8  |
| 2016 | 1      | 195.4 | 174.5 | 39.1 | 26.2 | 24.9 | 15.8 | 53.0 | 0.8 | 18.9 | 26.4 | 4.2 | 1.5 | 4.4     | 5.7  |
|      | 2      | 193.9 | 166.0 | 50.1 | 20.0 | 24.3 | 19.3 | 43.1 | 3.1 | 14.3 | 10.3 | 5.0 | 2.2 | 3.6     | 6.0  |
|      | 3      | 159.8 | 142.4 | 35.3 | 18.8 | 19.3 | 16.0 | 37.0 | 0.8 | 16.0 | 14.6 | 5.5 | 0.9 | 2.1     | 5.1  |
| 2017 | 1      | 155.7 | 133.1 | 27.5 | 25.8 | 17.6 | 20.6 | 31.7 | 2.2 | 11.9 | 10.8 | 1.3 | 2.4 | 1.8     | 4.9  |
|      | 2      | 146.0 | 132.5 | 27.2 | 21.1 | 25.3 | 17.6 | 42.2 | 1.3 | 13.4 | 4.8  | 3.2 | 1.7 | 2.1     | 7.3  |
|      | 3      | 191.3 | 159.5 | 38.6 | 26.8 | 20.1 | 23.0 | 38.5 | 0.9 | 9.2  | 11.2 | 3.1 | 2.1 | 1.5     | 10.4 |
| 2018 | 1      | 174.0 | 148.6 | 34.8 | 19.2 | 21.1 | 13.4 | 36.0 | 1.2 | 16.7 | 6.1  | 3.8 | 4.2 | 6.1     | 11.7 |
|      | 2      | 166.6 | 144.9 | 38.2 | 21.0 | 19.3 | 12.4 | 36.5 | 0.4 | 17.4 | 4.3  | 3.3 | 2.3 | 4.3     | 17.3 |
|      | 3      | 142.1 | 127.1 | 36.8 | 14.2 | 24.2 | 10.2 | 43.2 | 1.5 | 19.3 | 2.1  | 4.3 | 0.1 | 2.6     | 5.5  |
| 2019 | 1      | 152.4 | 129.8 | 44.8 | 16.0 | 14.7 | 14.5 | 35.1 | 0.9 | 14.1 | 2.9  | 2.6 | 0.5 | 1.9     | 8.0  |
|      | 2      | 158.9 | 138.4 | 35.9 | 18.2 | 18.9 | 12.4 | 34.6 | 1.6 | 20.0 | 4.3  | 6.3 | 2.1 | 3.0     | 7.8  |
|      | 3      | 182.7 | 157.4 | 38.1 | 15.5 | 18.6 | 12.5 | 39.9 | 1.1 | 18.1 | 2.8  | 6.2 | 1.0 | 1.9     | 15.0 |

Footnotes: Table shows main classes of antibiotics in use during the study. Period: Consumption was collected on a 4-monthly basis. It includes three periods per year; ATM: Antimicrobials; AB: Antibiotics; PEN: Penicillins (cloxacillin, penicillin G, ampicillin, amoxicillin-clavulanate, and piperacillin-tazobactam); CEPH: Cephalosporins (cefuroxime, ceftriaxone, ceftazidime, and cefepime); CARB: Carbapenems (meropenem, imipenem, and ertapenem); FQ: Fluoroquinolones (ciprofloxacin, levofloxacin, and moxifloxacin); BSA: Broad-spectrum antibiotics (meropenem, imipenem, piperacillin-tazobactam, and cefepime); AMG: Aminoglycosides (amikacin, gentamicin, and tobramycin); GP: Glycopeptides (teicoplanin and vancomycin); Cs: Colistin; MC: Macrolides (azithromycin, clarithromycin, and erythromycin); TG: Tigecycline; CLD+MTZ: Clindamycin + metronidazole; DPT: Daptomycin.

Table S3. Point prevalence survey characteristics. Period 2013-2019

|                                                                    | 2013       | 2014       | 2015       | 2016       | 2017       | 2018       | 2019       | P-Value |
|--------------------------------------------------------------------|------------|------------|------------|------------|------------|------------|------------|---------|
| <b>Overall patients included in the point prevalence survey, N</b> | <b>360</b> | <b>346</b> | <b>353</b> | <b>378</b> | <b>389</b> | <b>359</b> | <b>388</b> |         |
| <i>Patients on antimicrobial therapy, N (%)</i>                    | 248(69)    | 243 (70)   | 262 (74)   | 280 (74)   | 264 (68)   | 257 (72)   | 284 (73)   | 0.01    |
| <b>Overall antimicrobials on use, N</b>                            | <b>383</b> | <b>396</b> | <b>430</b> | <b>470</b> | <b>476</b> | <b>450</b> | <b>493</b> |         |
| <i>Correct duration of therapy, N (%)</i>                          | 320(84)    | 301(76)    | 354 (82)   | 371 (79)   | 405 (85)   | 383 (85)   | 429 (87)   | 0.17    |
| <i>Correct de-escalation, N (%)</i>                                | 320(84)    | 321(81)    | 384 (89)   | 421 (90)   | 444 (93)   | 406 (90)   | 458 (93)   | <0.01   |
| <i>Appropriateness of therapy, N (%)</i>                           | 291(76)    | 278 (70)   | 335 ( 78)  | 354 (75)   | 398 (84)   | 359 (80)   | 422 86)    | <0.01   |

Footnotes: P-Value was assessed using Pearson's Chi-squared test
